# Supplementary material
Source: publisher figshare collection journal article supplement (https://sage.figshare.com/ndownloader/files/18004916)
Supplement: Supplementary file 1 [file 18004916]

Appendix  
Mobilization for Peace: Analyzing Religious Peace  
Activism

# 1 Robustness Checks

Table 1: Mobilization for Peace: Interaction Models

|                                                                   | (1)                   | (2)                   | (3)                   | (4)                   | (5)                   | (6)                   |
|-------------------------------------------------------------------|-----------------------|-----------------------|-----------------------|-----------------------|-----------------------|-----------------------|
| L.Religious Discrimination                                        | -0.074**<br>(0.024)   |                       |                       | -0.032<br>(0.024)     |                       | -0.029<br>(0.024)     |
| L.Civil War                                                       | 1.294**<br>(0.449)    | 0.951*<br>(0.373)     |                       |                       |                       |                       |
| L.Civil War $\times$ L.Religious Discrimination                   | -0.012<br>(0.020)     |                       |                       |                       |                       |                       |
| L.Group Size                                                      |                       | 1.635***<br>(0.463)   | 1.955***<br>(0.404)   |                       | 1.773***<br>(0.272)   |                       |
| L.Civil War $\times$ L.Group Size                                 |                       | 0.470<br>(0.615)      |                       |                       |                       |                       |
| L.Religious Conflict Identity                                     |                       |                       | 1.380**<br>(0.440)    | 1.243***<br>(0.365)   |                       |                       |
| L.Religious Conflict Identity $\times$ L.Group Size               |                       |                       | -1.441*<br>(0.671)    |                       |                       |                       |
| L.Religious Conflict Identity $\times$ L.Religious Discrimination |                       |                       |                       | -0.014<br>(0.024)     |                       |                       |
| L.Religious Conflict Goal                                         |                       |                       |                       |                       | 0.298<br>(0.533)      | 0.489<br>(0.507)      |
| 1L.Religious Conflict Goal $\times$ L.Group Size                  |                       |                       |                       |                       | 0.473<br>(1.189)      |                       |
| L.Religious Conflict Goal $\times$ L.Religious Discrimination     |                       |                       |                       |                       |                       | 0.003<br>(0.043)      |
| L.National Competition                                            | -0.124<br>(0.986)     | 0.092<br>(0.946)      | 0.316<br>(0.915)      | -0.092<br>(0.971)     | 0.044<br>(0.932)      | -0.277<br>(1.001)     |
| L.GDP pc (log)                                                    | 6.380***<br>(1.457)   | 6.396***<br>(1.466)   | 5.961***<br>(1.453)   | 5.728***<br>(1.366)   | 6.464***<br>(1.555)   | 6.082***<br>(1.440)   |
| L.GDP Growth                                                      | 0.032**<br>(0.012)    | 0.028*<br>(0.012)     | 0.025*<br>(0.011)     | 0.030**<br>(0.010)    | 0.024*<br>(0.010)     | 0.025**<br>(0.009)    |
| L.Democracy                                                       | -0.208<br>(0.672)     | -0.143<br>(0.636)     | -0.010<br>(0.673)     | -0.150<br>(0.700)     | -0.143<br>(0.660)     | -0.244<br>(0.683)     |
| L.Repression                                                      | -0.022<br>(0.091)     | -0.021<br>(0.091)     | -0.119<br>(0.097)     | -0.107<br>(0.096)     | -0.138<br>(0.094)     | -0.143<br>(0.094)     |
| L.Regime Durability                                               | -0.068***<br>(0.017)  | -0.070***<br>(0.017)  | -0.070***<br>(0.018)  | -0.063***<br>(0.018)  | -0.072***<br>(0.018)  | -0.064***<br>(0.018)  |
| L.Peacekeeping Mission                                            | -1.687***<br>(0.394)  | -1.823***<br>(0.411)  | -1.847***<br>(0.396)  | -1.876***<br>(0.413)  | -1.922***<br>(0.391)  | -1.904***<br>(0.392)  |
| Constant                                                          | -46.040***<br>(9.239) | -45.553***<br>(9.176) | -42.294***<br>(9.090) | -39.996***<br>(8.644) | -45.214***<br>(9.839) | -41.851***<br>(9.074) |
| r <sup>2</sup> -p                                                 | 0.591                 | 0.594                 | 0.593                 | 0.575                 | 0.582                 | 0.569                 |
| N                                                                 | 2013                  | 2013                  | 2013                  | 2049                  | 2049                  | 2049                  |

+ p<0.10, \* p<0.05, \*\* p<0.01, \*\*\* p<0.001

Note: Temporal and religious type controls not shown. Standard errors in parentheses.

Table 2: Mobilization for Peace: Conflict Intensity

|                               | (1)                  | (2)                   | (3)                  | (4)                   | (5)                  | (6)                   |
|-------------------------------|----------------------|-----------------------|----------------------|-----------------------|----------------------|-----------------------|
|                               | Conditional logit    | Logit                 | Conditional logit    | Logit                 | Conditional logit    | Logit                 |
| L.Civil War                   | 1.083+<br>(0.581)    | 1.170*<br>(0.556)     |                      |                       |                      |                       |
| L.Religious Conflict Identity |                      |                       | 0.697<br>(0.546)     | 0.970**<br>(0.303)    |                      |                       |
| L.Religious Conflict Goal     |                      |                       |                      |                       | 0.391<br>(0.740)     | 0.825+<br>(0.449)     |
| L.intdum                      | -0.355<br>(0.404)    | -0.023<br>(0.397)     | 0.057<br>(0.298)     | 0.402<br>(0.266)      | 0.204<br>(0.269)     | 0.544*<br>(0.265)     |
| L.National Competition        | 0.334<br>(0.855)     | -0.043<br>(0.971)     | 0.491<br>(0.837)     | 0.123<br>(0.971)      | 0.378<br>(0.846)     | -0.022<br>(0.990)     |
| L.GDP pc (log)                | 6.743***<br>(1.306)  | 6.297***<br>(1.449)   | 6.625***<br>(1.306)  | 6.104***<br>(1.418)   | 6.914***<br>(1.285)  | 6.603***<br>(1.502)   |
| L.GDP Growth                  | 0.020<br>(0.016)     | 0.030*<br>(0.012)     | 0.023<br>(0.015)     | 0.031**<br>(0.012)    | 0.022<br>(0.014)     | 0.030*<br>(0.012)     |
| L.Democracy                   | -0.083<br>(0.479)    | -0.193<br>(0.651)     | -0.088<br>(0.474)    | -0.134<br>(0.678)     | -0.163<br>(0.477)    | -0.281<br>(0.657)     |
| L.Repression                  | -0.030<br>(0.095)    | -0.011<br>(0.090)     | -0.071<br>(0.091)    | -0.051<br>(0.098)     | -0.074<br>(0.090)    | -0.054<br>(0.096)     |
| L.Regime Durability           | -0.075***<br>(0.016) | -0.069***<br>(0.017)  | -0.076***<br>(0.016) | -0.070***<br>(0.017)  | -0.076***<br>(0.016) | -0.071***<br>(0.017)  |
| L.Peacekeeping Mission        | -1.657***<br>(0.394) | -1.778***<br>(0.403)  | -1.682***<br>(0.396) | -1.811***<br>(0.404)  | -1.688***<br>(0.393) | -1.785***<br>(0.391)  |
| Constant                      |                      | -45.303***<br>(9.166) |                      | -43.835***<br>(9.031) |                      | -46.934***<br>(9.587) |
| r2_p                          | 0.434                | 0.587                 | 0.432                | 0.589                 | 0.431                | 0.586                 |
| N                             | 1149                 | 2013                  | 1149                 | 2013                  | 1149                 | 2013                  |

+ p<0.10, \* p<0.05, \*\* p<0.01, \*\*\* p<0.001

Note: Temporal and religious type controls not shown. Standard errors in parentheses.

Table 3: Mobilization for Peace: Conflict Duration

|                               | (1)                  | (2)                   | (3)                  | (4)                   | (5)                  | (6)                   |
|-------------------------------|----------------------|-----------------------|----------------------|-----------------------|----------------------|-----------------------|
|                               | Conditional logit    | Logit                 | Conditional logit    | Logit                 | Conditional logit    | Logit                 |
| L.Civil War                   | 0.759+<br>(0.395)    | 1.136**<br>(0.376)    |                      |                       |                      |                       |
| L.Religious Conflict Identity |                      |                       | 0.755<br>(0.497)     | 1.101***<br>(0.299)   |                      |                       |
| L.Religious Conflict Goal     |                      |                       |                      |                       | 0.475<br>(0.736)     | 0.900*<br>(0.443)     |
| L.War Duration                | -0.018<br>(0.033)    | 0.003<br>(0.030)      | -0.006<br>(0.032)    | 0.023<br>(0.030)      | -0.002<br>(0.032)    | 0.024<br>(0.029)      |
| L.National Competition        | 0.374<br>(0.859)     | -0.048<br>(0.975)     | 0.510<br>(0.834)     | 0.102<br>(0.963)      | 0.391<br>(0.837)     | -0.054<br>(0.972)     |
| L.GDP pc (log)                | 6.757***<br>(1.309)  | 6.309***<br>(1.420)   | 6.598***<br>(1.302)  | 5.988***<br>(1.384)   | 6.925***<br>(1.277)  | 6.501***<br>(1.468)   |
| L.GDP Growth                  | 0.023<br>(0.015)     | 0.030**<br>(0.012)    | 0.023<br>(0.014)     | 0.027*<br>(0.011)     | 0.020<br>(0.014)     | 0.024*<br>(0.010)     |
| L.Democracy                   | -0.079<br>(0.481)    | -0.199<br>(0.647)     | -0.066<br>(0.476)    | -0.102<br>(0.693)     | -0.142<br>(0.479)    | -0.241<br>(0.671)     |
| L.Repression                  | -0.028<br>(0.094)    | -0.010<br>(0.090)     | -0.082<br>(0.086)    | -0.093<br>(0.096)     | -0.107<br>(0.083)    | -0.122<br>(0.093)     |
| L.Regime Durability           | -0.075***<br>(0.016) | -0.069***<br>(0.017)  | -0.076***<br>(0.016) | -0.070***<br>(0.018)  | -0.077***<br>(0.016) | -0.071***<br>(0.018)  |
| L.Peacekeeping Mission        | -1.652***<br>(0.394) | -1.779***<br>(0.402)  | -1.688***<br>(0.395) | -1.840***<br>(0.399)  | -1.713***<br>(0.390) | -1.823***<br>(0.381)  |
| Constant                      |                      | -45.379***<br>(8.928) |                      | -42.579***<br>(8.707) |                      | -45.502***<br>(9.276) |
| r <sup>2</sup> p              | 0.434                | 0.587                 | 0.432                | 0.588                 | 0.430                | 0.584                 |
| N                             | 1149                 | 2013                  | 1149                 | 2013                  | 1149                 | 2013                  |

+ p<0.10, \* p<0.05, \*\* p<0.01, \*\*\* p<0.001

Note: Temporal and religious type controls not shown. Standard errors in parentheses.

Table 4: Mobilization for Peace: Conflict Sample

|                                         | (1)                  | (2)                    | (3)                  | (4)                   | (5)                  | (6)                   |
|-----------------------------------------|----------------------|------------------------|----------------------|-----------------------|----------------------|-----------------------|
|                                         | Conditional logit    | Logit                  | Conditional logit    | Logit                 | Conditional logit    | Logit                 |
| L.Civil Wars (5 years)                  | 1.924***<br>(0.517)  | 1.930*<br>(0.833)      |                      |                       |                      |                       |
| L.National Competition                  | 0.071<br>(0.858)     | -0.214<br>(0.862)      | 0.275<br>(0.847)     | -0.095<br>(0.997)     | 0.434<br>(0.832)     | -0.020<br>(0.965)     |
| L.GDP pc (log)                          | 7.380***<br>(1.341)  | 7.154***<br>(1.678)    | 7.482***<br>(1.341)  | 6.615***<br>(1.481)   | 7.264***<br>(1.308)  | 6.491***<br>(1.455)   |
| L.GDP Growth                            | 0.016<br>(0.016)     | 0.022*<br>(0.010)      | 0.020<br>(0.015)     | 0.022*<br>(0.010)     | 0.021<br>(0.014)     | 0.023*<br>(0.010)     |
| L.Democracy                             | 0.104<br>(0.494)     | 0.045<br>(0.675)       | 0.169<br>(0.498)     | 0.110<br>(0.713)      | -0.119<br>(0.475)    | -0.094<br>(0.671)     |
| L.Repression                            | -0.061<br>(0.082)    | -0.112<br>(0.091)      | -0.108<br>(0.080)    | -0.149<br>(0.096)     | -0.117<br>(0.080)    | -0.158+<br>(0.095)    |
| L.Regime Durability                     | -0.063***<br>(0.018) | -0.059***<br>(0.018)   | -0.073***<br>(0.016) | -0.069***<br>(0.018)  | -0.083***<br>(0.017) | -0.072***<br>(0.018)  |
| L.Peacekeeping Mission                  | -2.143***<br>(0.412) | -2.279***<br>(0.378)   | -1.688***<br>(0.385) | -1.838***<br>(0.393)  | -1.725***<br>(0.390) | -1.862***<br>(0.376)  |
| L.Religious Conflict Identity (5 years) |                      |                        | 1.461+<br>(0.819)    | 1.063***<br>(0.309)   |                      |                       |
| L.Religious Conflict Goals (5 years)    |                      |                        |                      |                       | 14.920<br>(998.279)  | 1.035*<br>(0.408)     |
| Constant                                |                      | -51.720***<br>(10.989) |                      | -46.212***<br>(9.398) |                      | -45.669***<br>(9.210) |
| r <sup>2</sup> _p                       | 0.447                | 0.592                  | 0.434                | 0.587                 | 0.434                | 0.584                 |
| N                                       | 1149                 | 2013                   | 1149                 | 2013                  | 1149                 | 2013                  |

+ p<0.10, \* p<0.05, \*\* p<0.01, \*\*\* p<0.001

Note: Temporal and religious type controls not shown. Standard errors in parentheses.

Table 5: Mobilization for Peace: Polity 2

|                               | (1)                  | (2)                   | (3)                  | (4)                   | (5)                  | (6)                   | (7)                  | (8)                   | (9)                  | (10)                  |
|-------------------------------|----------------------|-----------------------|----------------------|-----------------------|----------------------|-----------------------|----------------------|-----------------------|----------------------|-----------------------|
|                               | Conditional logit    | Logit                 |
| Religious Discrimination      | -0.135*<br>(0.068)   | -0.069**<br>(0.024)   |                      |                       |                      |                       |                      |                       |                      |                       |
| L.Group Size                  |                      |                       | 9.331+<br>(5.536)    | 1.912***<br>(0.373)   |                      |                       |                      |                       |                      |                       |
| L.Civil War                   |                      |                       |                      |                       | 0.941**<br>(0.313)   | 1.256**<br>(0.393)    |                      |                       |                      |                       |
| L.Religious Conflict Identity |                      |                       |                      |                       |                      |                       | 0.921*<br>(0.459)    | 1.213***<br>(0.315)   |                      |                       |
| L.Religious Conflict Goal     |                      |                       |                      |                       |                      |                       |                      |                       | 0.550<br>(0.709)     | 0.985*<br>(0.421)     |
| L.National Competition        | 0.296<br>(0.705)     | 0.167<br>(0.601)      | 1.097<br>(0.823)     | 0.318<br>(0.591)      | 0.148<br>(0.759)     | -0.129<br>(0.692)     | 0.376<br>(0.720)     | 0.152<br>(0.664)      | 0.345<br>(0.701)     | 0.161<br>(0.601)      |
| L.GDP pc (log)                | 5.453***<br>(1.169)  | 5.169***<br>(1.528)   | 5.590***<br>(1.171)  | 5.396***<br>(1.551)   | 5.997***<br>(1.226)  | 5.883***<br>(1.431)   | 5.384***<br>(1.189)  | 5.049***<br>(1.478)   | 5.713***<br>(1.167)  | 5.498***<br>(1.558)   |
| L.GDP Growth                  | 0.014<br>(0.013)     | 0.021*<br>(0.010)     | 0.012<br>(0.013)     | 0.019+<br>(0.010)     | 0.015<br>(0.014)     | 0.027*<br>(0.011)     | 0.014<br>(0.013)     | 0.022*<br>(0.011)     | 0.012<br>(0.013)     | 0.020*<br>(0.010)     |
| L.Polity 2                    | -0.000<br>(0.044)    | -0.019<br>(0.061)     | 0.012<br>(0.044)     | -0.025<br>(0.063)     | 0.035<br>(0.046)     | 0.018<br>(0.059)      | 0.018<br>(0.045)     | -0.005<br>(0.061)     | 0.007<br>(0.044)     | -0.016<br>(0.060)     |
| L.Regime Durability           | -0.067***<br>(0.018) | -0.069***<br>(0.019)  | -0.070***<br>(0.018) | -0.074***<br>(0.020)  | -0.064***<br>(0.018) | -0.062**<br>(0.019)   | -0.068***<br>(0.018) | -0.068***<br>(0.019)  | -0.071***<br>(0.017) | -0.070***<br>(0.019)  |
| L.Peacekeeping Mission        | -1.513***<br>(0.366) | -1.642***<br>(0.333)  | -1.570***<br>(0.371) | -1.745***<br>(0.348)  | -1.436***<br>(0.375) | -1.585***<br>(0.353)  | -1.491***<br>(0.375) | -1.654***<br>(0.349)  | -1.507***<br>(0.371) | -1.629***<br>(0.337)  |
| Constant                      |                      | -38.067***<br>(9.635) |                      | -38.913***<br>(9.816) |                      | -43.130***<br>(9.026) |                      | -37.183***<br>(9.356) |                      | -40.214***<br>(9.907) |
| r <sup>2</sup> p              | 0.428                | 0.579                 | 0.425                | 0.583                 | 0.431                | 0.584                 | 0.426                | 0.582                 | 0.422                | 0.578                 |
| N                             | 1195                 | 2074                  | 1195                 | 2074                  | 1195                 | 2074                  | 1195                 | 2074                  | 1195                 | 2074                  |

+ p<0.10, \* p<0.05, \*\* p<0.01, \*\*\* p<0.001

Note: Temporal and religious type controls not shown. Standard errors in parentheses.

## 2 RGPAD Dataset

### Religious Groups

Religious groups were identified according to the *Religious and State Minorities* (RASM) and *Religion And State Round 2* (RAS2) dataset (Akbaba and Fox, 2011; Fox, 2011). The RGPAD dataset includes only groups for which the *Religious Characteristics of States* (RCS) provides information on the number of adherents (Brown and James, 2018).

All groups that meet a population threshold of 0.25 percent of the population are coded separately. Please note that RGPAD codes Spiritist's as Other and Indigenous as Animists groups, while RASM and RAS2 code Spiritist's and Other Indigenous both as Animists. The following religious groups were identified:

1. Christian, Catholic
2. Christian, Protestant
3. Christian, Orthodox
4. Christian, other
5. Christian, general (cases where all Christian minorities are coded together usually duo to there being few Christians in the country or when the denomination of the Christians in question are unclear)
6. Islam, Sunni
7. Islam, Shiite
8. Islam, other
9. Islam, general (cases where all Muslim minorities are coded together usually duo to there being few Muslims in the country or when the denomination of the Muslims in question are unclear)
10. Hindu
11. Buddhist
12. Jewish
13. Animist, ancestor worship, or traditional religion
14. Zoroastrian
15. Bahai



16. Confucian
17. Chinese religions
18. Sikh
19. Other

### 3 Variables

#### **groupID**

Group Identifier

Gleditsch and Ward country code (gwno) + code of the religious community *Examples* Afghanistan Christians, general = 700 (gwno) = 05 (Christian, general) = 70005 Bahamas Bahai = 31 (gwno) + 15 (Bahai) = 3115

#### **Peace activism**

Did the religious group participate in peace activism?

0 = no

1 = yes

Peace activism is identified according to three criteria: (i) religious groups must be the main activists, (ii) the goal of activism must be the termination or prevention of violence, and (iii) some activities need to be detectable in the coding sources.

#### **Type of Peace activism**

0 = no peace activism

1 = peace activism supported only by one religious group

2 = inter-religious peace activism (supported by at least two religious groups)

## 4 RGPAD: Peace Activism Overview

### **Afghanistan**

Mediation by the OIC in 1993-1995

Religious groups coded: Islam, Shiite; Islam, Sunni

Years coded: 1993-1995

### **Afghanistan**

Mediation by the OIC in 1998

Religious groups coded: Islam, Shiite; Islam, Sunni

Years coded: 1998

### **Algeria**

Mediation by Sant Egidio in 1994 - 1995

Sant Egidio developed friendships with the archbishops of Algiers. In late 1994, Sant Egidio invited political and social leaders from Algeria to Rome to facilitate the communication and exchanges of ideas and standpoints between the actors. The Rome Platform was unsuccessful in ending the conflict but helped opening new communication channels between the various conflict parties.

Religious group coded: Christian, general

Years coded: 1994-1995

### **Angola**

Inter-Ecclesiastical Committee for Peace in Angola (COIEPA) 1999 - 2008

COIEPA was established 1999 by three Catholic and Protestant umbrella organizations: the Council of Christian Churches in Angola, Episcopal Council of Angola and Sao Tome, and Association of Evangelicals in Angola. COIEPA organized a peace congress in July 2000 with representatives from all political parties, religious communities, and leaders of the civil society. COIEPA tried to mediate between the various active conflict parties within the country and conducted several peace promoting campaigns and workshops throughout the country.

Mediation by the Association of Catholic Bishops in 2000 (Johnstone and Svensson, 2013).

Religious group coded: Christian, general

Years coded: 1999-2008

### **Benin**

Mediation by Archbishop de Souza 1991

Archbishop de Souza entreated to the former president to calm his fellow country men during heated elections. The archbishop presided over the national conference and tried to calm the political situation.

Religious group coded: Christian, general  
Year coded: 1991

### **Benin**

Catholic and Muslim leaders mediated in 2004 and 2005

Religious leaders (Catholic and Muslims) mediated between public- and private sector unions with the government. The mediation lead to an agreement in January 2005.

Religious groups coded: Christian, general; Islam, general  
Years coded: 2004-2005

### **Burma**

Mediation by Anglican bishop in 1994

Anglican archbishop of Myanmar, Andrew Mya Han, as intermediary between the SLORC and the KNU.

Religious group coded: Christian, general  
Years coded: 1994

### **Burma**

Mediation by Buddhist monk U Rewata Dhamma in 1994

Religious groups coded: Buddhist  
Years coded: 1994

### **Burundi**

Mediation by bishop Bernard Budadira in 1994

Bishop Bernard Budadira mediated meetings and agreements between the government and opposition parties.

Religious group coded: Christian, Catholic  
Year coded: 1994

### **Burundi**

Mediation by Sant'Egidio in 1995-2001

Sant'Egidio mediated between the government and representatives from the CNDD

Religious group coded: Christian, Catholic  
Years coded: 1995-2001

### **Burundi**

Mediation by Archbishop and Vatican Ambassador

Religious group coded: Christian, Catholic

Year coded: 2003

### **Cambodia**

Buddhists Dhammayietra (peace marches) 1992 - 2008

Religious group coded: Buddhist

Years coded: 1992-2008

### **Chad**

Peace campaign by Muslim religious leaders in 2007

Regular meetings between religious leaders of the Muslim community to discuss peaceful collaboration among groups.

Religious groups coded: Islam, general; Islam, other

Year coded: 2007

### **Central African Republic**

Mediation by Catholic bishop in 1996

Catholic archbishop of Bangui, Mgr Joachim N'Dayen, pursued negotiations with the rebels.

Religious group coded: Christian, general

Year coded: 1996

### **Central African Republic**

National reconciliation conference and mediation by the Catholic church in 1998

Mediation between the various opposition parties to participate in a high level national reconciliation conference by the Catholic Church.

Religious group coded: Christian, general

Year coded: 1998

### **Central African Republic**

Catholic church peace campaign 2000 - 2003

Catholic church promoted a national dialogue and reconciliation. Catholic Commission for Justice and Peace organised a large rally on April 15, 2000. Since 2001, promotion and direction of the 'dialogue nationale' by bishop Pomodimo (Bossango, archbishop of Bangui) together with former prime minister Maidou.

Religious group coded: Christian, general

Years coded: 2000-2003

### **Central African Republic**

Mediation by Pastor Isaac Zokoue in 2007

Pastor Isaac Zokoue mediated the Syrte agreement to end the political crisis and the civil war.

Religious group coded: Christian, general

Year coded: 2007

### **Colombia**

Peace campaign by the Catholic church 1995-2001

The Catholic Church started a peace campaign in 1995. They publicized a comprehensive study on the phenomenon of internal forced displacement, single greatest cause of displacement is guerrilla incursion into the rural civilian population (Episcopal Bishop's Conference). The church investigated and published on human rights abuses by government forces, the paramilitaries, and guerrillas. They promoted, together with representatives of the civil society, a negotiated solution of the conflict.

In 1997, the church actively supported San Jose De Apartado, Uraba, and 22 outlying hamlets in their declaration on March 23 1997 to be a neutral peace community - off limits to all participants in the armed conflict, investigation and reports on human rights abuses by government forces, the paramilitaries, and guerrillas. Moreover, church representatives were also involved in negotiations with the FARC in 1997. From 1998 to 2001, local Colombian Catholic priests and German Catholic priests mediated in the conflicts.

Religious groups coded: Christian, Catholic

Years coded: 1995-2001

### **Colombia**

Local peace efforts by the Catholic church 2002 - 2008

A number of faith-based nongovernmental organizations promote human rights, social and economic development, and a negotiated settlement for the armed conflict. The most influential of these organizations either are affiliated with the Catholic Church or were founded by Church officials.

Religious groups coded: Christian, Catholic

Years coded: 2002-2008

### **Colombia**

Mediation by Pope John Paul II in 2004

Religious group coded: Christian, Catholic

Year coded: 2004

### **Cote d'Ivoire**

Inter-religious peace initiative Forum of Religious Confessions, 1997 - 2008

Forum of Religious Confessions: promotion of political stability, understanding, conflict management, mediating between the parties.

Religious groups coded: Christian, general; Islam, general; Animists

Years coded: 1997-2008

### **Democratic Republic of Congo**

Mediation by Pope John Paul II in 1998

Religious group coded: Christian, Catholic

Year coded: 1998

### **Egypt**

Mediation by Muslim intellectuals and scholars in 1993

Religious groups coded: Islam, general

Year coded: 1993

### **Eritrea**

Religious leaders worked with their Ethiopian counterparts on a peaceful solution of the Eritrea-Ethiopia conflict, 1998 - 2002

Religious communities from Eritrea and Ethiopia met in Oslo (July 2000) for the fourth time in an ecumenical peace effort to resolve the Eritrea-Ethiopia conflict. Religious leaders and Foreign Ministry officials met with their Ethiopian religious counterparts in Eritrea. The religious leader then traveled to Ethiopia to continue their discussions. They issued statements appealing for peace and reconciliation between the two countries.

Religious groups coded: Christian, Catholics; Christian, other; Christian, general; Islam, general; Animists

Years coded: 1998-2002

### **Ethiopia**

Joined peace effort by the Ethiopia-Orthodox, Catholic and Protestant Mekane-Yesus-Church, and the High Islamic Council in 1990

On July 7, 1990, the Ethiopia-Orthodox, Catholic and protestant Mekane-Yesus-Church together with the High Islamic Council published a peace call to end the conflict between the EPLF and EPRDF.

Religious groups coded: Christian, Protestant; Christian, other; Islam, general; Mixed

Year coded: 1990

### **Ethiopia**

Religious leaders worked with their Ethiopian counterparts on a peaceful solution

of the Eritrea-Ethiopia conflict, 1998 - 2002

Religious communities from Eritrea and Ethiopia meet in Oslo (July 2000) for the fourth time in an ecumenical peace effort to resolve the Eritrea-Ethiopia conflict. Religious leaders and Foreign Ministry officials met with their Ethiopian religious counterparts in Eritrea. The religious leader then traveled to Ethiopia to continue their discussions. They issued statements appealing for peace and reconciliation between the two countries.

Religious groups coded: Christian, Protestant; Christian, other; Islam, general; Mixed

Years coded: 1998-2002

### **Guatemala**

Mediation by Catholic bishop Roldofo Quezada Toruno, 1991-1993

Religious group coded: Christian, Catholic

Years coded: 1991-1993

### **Guatemala**

Mediation by Mayan Indigenous Leaders in 1994

Religious group coded: Animist

Year coded: 1994

### **Guatemala**

Mediation by the Lutheran World Federation in 1994-1995

Religious group coded: Christian, Protestant

Years coded: 1994-1995

### **Guatemala**

Mediation by Sant Egidio in 1996

Religious group coded: Christian, Catholic

Year coded: 1996

### **Guatemala**

Christian churches peace campaign, 2002 - 2005

FEPAZ's initial work sought to address Guatemala's peace process and post-conflict violence.

Religious groups coded: Christian, Catholic; Christian, Protestant

Years coded: 2002-2005

### **Guinea-Bissau**

Mediations by the Catholic church (bishop Settimio Ferrazzeta) and by local reli-

gious leaders in 1998

Religious groups coded: Christian, general; Islam, general; Animist; Mixed

Year coded: 1998

### **Indonesia**

Inter-religious peace initiative *Papua, the Land of Peace*, 1995-2008

Religious groups in Papua jointly engaged in a peace campaign toward the vision *Papua, the Land of Peace*. The collaboration among the religions, including Islam, Christianity (Catholic and Protestant Churches), Hinduism, and Buddhism, for peace in West Papua was formally begun in 2000.

Religious groups coded: Christian, general; Muslim, Sunni; Islam, Shiite; Hindu; Buddhist

Years coded: 1995-2008

### **Iraq**

Mediation by Moqtada al-Sadr in 2004 and 2005

Shiite religious authorities mediated in 2004. Accommodation attempts by ongoing efforts by the young Shia cleric, Moqtada al-Sadr, to mediate between the Sunni Arabs and the Shia block.

Religious groups coded: Islam, Shiite

Years coded: 2004-2005

### **Iraq**

Mediation by Pope Johan Paul II in 2004

Religious group coded: Christian, general

Year coded: 2004

### **Israel**

Mediation by the OIC in 2000 and 2001

Religious group coded: Islam, general

Years coded: 2000-2001

### **Israel**

Mediation by Catholic Bishop Michel Sabbah and the Rainbow/PUSH Coalition in 2002

Religious group coded: Christian, general

Year coded: 2002

### **Kenya**

Peace campaign by the Church of the Province of Kenya in 1991



Bishop Henry Okullu from the Church of the Province of Kenya (CPK) and Paul Muite announced that the religious group together with lawyer organizations funded the Justice and Peace Convention. The goal was to conduct prayer symposium through out the country for justice and peace in a democratic Kenya. The government stopped the efforts.

Religious group coded: Christian, general

Year coded: 1991

### **Kenya**

Christian, Hindu and Muslim leaders formed the Ufungamano Initiative, 1999 - 2001

Christian, Muslim and Hindu leaders formed an alternative process to reform the Constitution, the Ufungamano Initiative, which opposes the Parliament-led process. The Ufungamano Initiative actively seeks input from civil society and others into the reform process.

Religious groups coded: Christian, general; Islam, general; Hindu

Years coded: 1999-2001

### **Lebanon**

Mediation by a Vatican envoy in 1990

Ceasefire mediation by an envoy of the Vatican.

Religious group coded: Christian, other

Year coded: 1990

### **Liberia**

Mediation by the Liberian Council of Churches and the Inter-religious Council in 1990

Liberian Council of Churches acted as mediator at the US embassy in Freetown.

Religious groups coded: Christian, general; Islam, general; Animist; Bahai

Year coded: 1990

### **Liberia**

Peace campaign and mediation by the Inter-Religious Council of Liberia, 2001 - 2003

The inter-Religious Council of Liberia tried to facilitate dialog between the government and the LURD rebels.

Religious groups coded: Christian, general; Islam, general; Animist; Bahai

Years coded: 2001-2003

### **Liberia**

Mediation by Sant'Egidio in 2003

Religious group coded: Christian, general

Year coded: 2003

### **Madagascar**

Peace campaign by the Christian Council FFKM 1990 and 1991

The church based consortium FFKM organised a national conference on national recovery on August 16. The council includes many longstanding and outspoken critics of the regime.

Religious group coded: Christian, general

Years coded: 1990-1991

### **Mali**

Local religious leaders involved in regional consultations in 1994

Series of regional consultations involving politicians, community leaders and religious notables because of the Tuareg conflict

Religious groups coded: Christian, general; Islam, Sunni; Animist

Years coded: 1994

### **Mali**

Inter-religious mediation attempt in 1997

A multi-faith mediation mission led by a Christian clergyman, Daniel Konat, declared on July 17 that its efforts towards a roundtable peace meeting had failed.

Religious groups coded: Christian, general; Islam, Sunni; Animist

Year coded: 1997

### **Mexico**

Mediation by Catholic bishop Samuel Ruiz in 1994

Religious group coded: Christian, Catholic

Year coded: 1994

### **Mexico**

Mediation by Evangelical and Catholic representatives in 2000

On August 3, 2000, Protestant Evangelical and Catholic representatives in Oaxaca ended 47 years of tensions between their communities by signing a peace accord in Santiago Jaltepec.

Religious groups coded: Christian, Protestant ; Christian, Catholic

Year coded: 2000

## **Mexico**

Transitional justice efforts by Catholic bishop Felipe Ariymendi in 2002

Catholic bishop Felipe Ariymendi reportedly asked for forgiveness for the offences that Catholics had committed against their evangelical neighbours, and asked Protestants to do the same. In January 2002, community members in Tila, Chiapas, signed a reconciliation agreement to put an end to the "political-religious" clashes of the region. The parties pledged to recognise and appeal the Constitution, which provides for ideological and religious freedom.

Religious group coded: Christian, Catholic

Year coded: 2002

## **Mozambique**

Mediation by Sant'Egidio and Archbishop of Beira, Jaime Gonclaves, in 1990-1992

Religious group coded: Christian, general

Years coded: 1990-1992

## **Mozambique**

Peace campaign by the Christian Council, 1995 - 2008

Christian Council has undertaken a project to collect arms throughout the country. It has held several rallies where people were able to exchange arms for agricultural equipment.

Religious groups coded: Christian, general

Years coded: 1995-2008

## **Nicaragua**

Mediation by the Catholic Church in 1993

Cardinal Miguel Oando was sent by the Nicaraguan government as a mediator to unrests over Nicaragua's borders with Costa Rica.

Religious group coded: Christian, Catholic

Year coded: 1993

## **Nicaragua**

Mediation by the Catholic Church in 1994

Catholic Church and the Comision Interacional de Ayuda y Verificacion of the OAS successfully mediated a peace agreement between the government and the rebels in March 1994.

Religious group coded: Christian, Catholic

Year coded: 1994

## **Nicaragua**

Catholic Church peace campaign, 1996-1997

Catholic Church helped to create 45 (in total: 70 in 1997) peace commissions in the northern and central parts of the country, intended to give inhabitants of the area a means of dispute resolution, a means of monitoring human rights abuses, and a vehicle for expressing their concerns to government authorities.

Religious group coded: Christian, Catholic

Years coded: 1996-1997

### **Nicaragua**

Mediation by the Moravian Church in 1998

Moravian Church mediated between the Miskitos and the government.

Religious group coded: Christian, Protestant

Year coded: 1998

### **Papua New Guinea**

Various mediation efforts by Christian organizations in 1993-1995

The Solomon Island Christian Association mediated in 1993. In 1994, the Bougainville Interchurch Womens Forum and in 1995 Moral Re-Armament mediated.

Religious groups coded: Christian, Catholic; Christian, Protestant; Christian, other

Years coded: 1993-1995

### **Philippines**

Inter-religious peace initiative in support of the Mindanao peace process, 1996-2008

Religious representatives supported the Mindanao peace process through work with communities of former combatants and in the Bishop-Ulama Conference.

Mediation by the OIC 1993-1996 and 2000. Catholic Priest Eliseo Mercado mediated in 1999.

Religious groups coded: Christian, Catholic; Christian, Protestant; Islam, general

Years coded: 1996-2008

### **Rwanda**

Mediation by Christian Churches in 1992

Mediation between the political parties by Christian churches.

Religious groups coded: Christian, Catholic; Christian, Protestant

Year coded: 1992

### **Rwanda**

Mediation by Sant'Egidio in 2005

Religious group coded: Christian, Catholic

Year coded: 2005

### **Saudi Arabia**

Islamic peace initiative in 2004

Safar al-Hawali, a renowned Islamic leader, announced that a group of more than 40 scholars was due to discuss mediation designed to prevent any further suicide bombings.

Religious group coded: Islam, Sunni

Year coded: 2004

### **Sierra Leone**

Mediation by the Sierra Leone Council of Churches in 1995

Religious group coded: Christian, general

Year coded: 1995

### **Sierra Leone**

Inter-religious peace initiative, 1997 - 2002

The Inter-Religious Council of Sierra Leone, composed of Christian and Muslim leaders, played a vital role in civil society and actively participates in the peace process.

Religious groups coded: Christian, general; Muslim, general

Years coded: 1997-2002

### **Somalia**

Mediation by the OIC in 1992 and 1993

Religious group coded: Islam, Sunni

Years coded: 1992-1993

### **Somalia**

Mediation by religious leaders in 1997

Successful mediation of religious and traditional leaders between the Hawiye Clan Abgal and Murosade in Mogadishu.

Religious groups coded: Christian, general; Islam, general

Year coded: 1997

### **Sri Lanka**

Inter-religious peace initiative, 1999 - 2008

Catholic bishops travel to Mullaitivu for talks with members of the LTTE. A group of religious leaders from Buddhist, Hindu, Muslim, and Christian communities made visits to the north central part of the country to assess the humanitarian situation and to talk with senior LTTE leaders.

Religious groups coded: Christian, general; Islam, general; Hindu; Buddhist  
Years coded: 1999-2008

### **Sudan**

Christian Churches, 1994 - 1999

New Sudanese Council of Churches mediated between the South Sudanese ethnic groups.

Religious group coded: Christian, general  
Years coded: 1994-1999

### **Tanzania**

Inter-religious peace initiative on Zanzibar in 2007

In April 2007 an interfaith committee, formed out of the Mufti's Office, the Zanzibar Muslim Ulamaa Council, and Anglican, Catholic, and Protestant bishops to discuss peace-building initiatives.

Religious groups coded: Christian, general; Islam, general  
Year coded: 2007

### **Thailand**

Mediation by members of the local Islamic Committees in 2004

Religious group coded: Islam, general  
Year coded: 2004

### **Timor**

Inter-religious reconciliation and peace initiative in 2002 and 2003

Catholic Church promoted reconciliation and lead in a project to rebuild three destroyed Protestant churches

Religious groups coded: Christian, Catholic; Christian, Protestant  
Years coded: 2002-2003

### **Timor**

Inter-religious peace initiative 2004

Catholic leader joined a series of public meetings by Muslim community in Los Palos to discuss the importance of showing mutual respect to persons of different faith (reaction to small groups of Catholic youths repeatedly stoned the mosques).

Religious groups coded: Christian, Catholic; Islam, general

Year coded: 2004

### **Timor**

Local inter-religious peace initiative 2005

Local conflict management in disputes with Protestant communities.

Religious groups coded: Christian, Catholic; Christian, Protestant

Year coded: 2005

### **Togo**

Mediation by Sant'Egidio in 2005

Talks between the political parties hosted by Sant'Egidio.

Religious group coded: Christian, general

Year coded: 2005

### **Trinidad and Tobago**

Mediation by Catholic and Anglican bishops in 1990

Religious group coded: Christian, Catholic

Year coded: 1990

### **Uganda**

Inter-religious peace initiative, 1996 - 2008

Acholi Religious Leaders Peace Initiative was active in the Acholi Region, Northern Uganda. It conducted many peace campaigns, educated local mediators, mediated between the conflict parties and successfully lobbied on the national and international level.

Apart from the inter-religious peace initiative, Sant'Egidio mediated in 1999, 2006 and 2007 in Uganda.

Religious groups coded: Christian, general; Islam, general

Years coded: 1996-2008

### **Yemen**

Mediation by the OIC in 1994

Religious groups coded: Islam, Shiite; Islam, general

Year coded: 1994

## 5 Comparison of RGPAD with RCDC and the Faith-based Mediation Dataset

For RCDC see (Vüllers et al., 2015) and for the Faith-based Mediation Dataset see (Johnstone and Svensson, 2013)

| <b>RGPAD</b>             | <b>Year</b> | <b>RCDC</b>               | <b>Faith-based Mediation</b> |
|--------------------------|-------------|---------------------------|------------------------------|
| Afghanistan              | 1993-1995   | No (only 1993 and 1995)   | Yes                          |
| Afghanistan              | 1998        | Yes                       | Yes                          |
| Algeria                  | 1994-1995   | No                        | Yes                          |
| Angola                   | 1999-2008   | Yes (not 2007-2008)       | No (only 2000)               |
| Benin                    | 1991        | No                        | No                           |
| Benin                    | 2004-2005   | No                        | No                           |
| Burma                    | 1994        | Yes                       | No (mediation by Anglican)   |
| Burma                    | 1994        | Yes                       | Yes (mediation by Buddhist)  |
| Burundi                  | 1994        | Yes                       | No                           |
| Burundi                  | 1995-2001   | Yes                       | Yes                          |
| Burundi                  | 2003        | Yes                       | Yes                          |
| Cambodia                 | 1992-2008   | No                        | No                           |
| Chad                     | 2007        | Yes                       | No                           |
| Central African Republic | 1996        | Yes                       | No                           |
| Central African Republic | 1998        | Yes                       | No                           |
| Central African Republic | 2000-2003   | No (only 2000)            | No                           |
| Central African Republic | 2007        | Yes                       | No                           |
| Colombia                 | 1995-2001   | No (only 1995-1998)       | No (only 1998, 1998-2001)    |
| Colombia                 | 2002-2008   | Yes                       | No                           |
| Colombia                 | 2004        | Yes                       | Yes                          |
| Cote d'Ivoire            | 1997-2008   | No                        | No                           |
| DRC                      | 1998        | No                        | Yes                          |
| Egypt                    | 1993        | No                        | Yes                          |
| Eritrea                  | 1998-2002   | No                        | No                           |
| Ethiopia                 | 1990        | Yes                       | No                           |
| Ethiopia                 | 1998-2002   | No (only 2002)            | No                           |
| Guatemala                | 1991-1993   | No                        | Yes                          |
| Guatemala                | 1994        | No                        | Yes                          |
| Guatemala                | 1994-1995   | No                        | Yes                          |
| Guatemala                | 1996        | No                        | Yes                          |
| Guatemala                | 2002-2005   | No (only 2002)            | No                           |
| Guineau-Bissau           | 1998        | Yes                       | Yes                          |
| Indonesia                | 1995-2008   | No (beginning after 2000) | No                           |
| Iraq                     | 2004-2005   | No (only 2005)            | No (only 2004)               |
| Iraq                     | 2004        | No                        | Yes                          |
| Israel                   | 2000-2001   | No                        | Yes                          |
| Israel                   | 2002        | No                        | Yes                          |
| Kenya                    | 1991        | Yes                       | No                           |
| Kenya                    | 1999-2001   | No                        | No                           |



| <b>RGPAD</b>        | <b>Year</b> | <b>RCDC</b>         | <b>Faith-based Mediation</b>   |
|---------------------|-------------|---------------------|--------------------------------|
| Lebanon             | 1990        | Yes                 | No                             |
| Liberia             | 1990        | Yes                 | Yes                            |
| Liberia             | 2001-2003   | No (only 2002-2003) | No (only 2003)                 |
| Liberia             | 2003        | Yes                 | Yes                            |
| Madagascar          | 1990-1991   | No                  | No                             |
| Mali                | 1994        | Yes                 | No                             |
| Mali                | 1997        | Yes                 | No                             |
| Mexico              | 1994        | No                  | Yes                            |
| Mexico              | 2000        | Yes                 | No                             |
| Mexico              | 2002        | Yes                 | No                             |
| Mozambique          | 1990-1992   | Yes                 | Yes                            |
| Mozambique          | 1995-2008   | Yes                 | No                             |
| Nicaragua           | 1993        | No                  | No                             |
| Nicaragua           | 1994        | No                  | No                             |
| Nicaragua           | 1996-1997   | Yes                 | No                             |
| Nicaragua           | 1998        | No                  | No                             |
| Papua New Guinea    | 1993-1995   | No                  | Yes                            |
| Philippines         | 1996-2008   | Yes (not 1997)      | No (single mediation attempts) |
| Rwanda              | 1992        | Yes                 | No                             |
| Rwanda              | 2005        | Yes                 | Yes                            |
| Saudi Arabia        | 2004        | Yes                 | No                             |
| Sierra Leone        | 1995        | No                  | Yes                            |
| Sierra Leone        | 1997-2002   | Yes                 | No (only 1999)                 |
| Somalia             | 1992-1993   | No                  | Yes                            |
| Somalia             | 1997        | Yes                 | No                             |
| Sri Lanka           | 1999-2008   | Yes                 | No                             |
| Sudan               | 1994-1999   | Yes                 | No                             |
| Tanzania            | 2007        | Yes                 | No                             |
| Thailand            | 2004        | No                  | Yes                            |
| Timor               | 2002-2003   | No (only 2003)      | No                             |
| Timor               | 2004        | No                  | No                             |
| Timor               | 2005        | Yes                 | No                             |
| Togo                | 2005        | Yes                 | No                             |
| Trinidad and Tobago | 1990        | Yes                 | Yes                            |
| Uganda              | 1996-2008   | Yes                 | No (only partially)            |
| Yemen               | 1994        | No                  | Yes                            |

## References

- Akbaba, Y. and Fox, J. (2011). The religion and state-minorities dataset. *Journal of Peace Research*, 48(6):807–816.
- Brown, D. and James, P. (2018). The religious characteristics of states: Classic themes and new evidence for international relations and comparative politics. *Journal of Conflict Resolution*, 62(6):1340–1376.
- Fox, J. (2011). Building composite measures of religion and state. *IJRR*, 7.
- Johnstone, N. and Svensson, I. (2013). Belligerents and believers: Exploring faith-based mediation in internal armed conflicts. *Politics, Religion & Ideology*, 14(4):557–579.
- Vüllers, J., Pfeiffer, B., and Basedau, M. (2015). Measuring the ambivalence of religion: Introducing the religion and conflict in developing countries (rcdc) dataset. *International Interactions*, 41(5):857–881.
